# Supplementary material for: Protective effects of klotho on palmitate-induced podocyte injury in diabetic nephropathy
Source: PLoS One. 2021 Apr 23;16(4):e0250666. doi: 10.1371/journal.pone.0250666 (PMC8064606; doi:10.1371/journal.pone.0250666)
Supplement: S1 File — (DOCX) [file pone.0250666.s002.docx]

**Protective effects of klotho on palmitate-induced podocyte injury in diabetic nephropathy**

Jeong Suk Kang1,2, Seung Seob Son1, Ji-Hye Lee3, Seong Woo Lee1,4, Ah Reum Jeong1, Eun Soo Lee5, Seung-Kuy Cha6, Choon Hee Chung5, and Eun Young Lee1,2,4*

1Department of Internal Medicine, Soonchunhyang University Cheonan Hospital, Cheonan, Korea

2Institute of Tissue Regeneration, College of Medicine, Soonchunhyang University, Cheonan, Korea

3Department of Pathology, Soonchunhyang University Cheonan Hospital, Cheonan, Korea

4BK21 Four project, College of Medicine, Soonchunhyang University, Cheonan, Korea

5Department of Internal Medicine, Yonsei University Wonju College of Medicine, Wonju, Korea

6Department of Physiology, Yonsei University Wonju College of Medicine, Wonju, Korea

*Corresponding author

E-mail: [eylee@sch.ac.kr](mailto:eylee@sch.ac.kr) (EYL)

**S1 Table. Clinical characteristics of patients with diabetic nephropathy.**

**
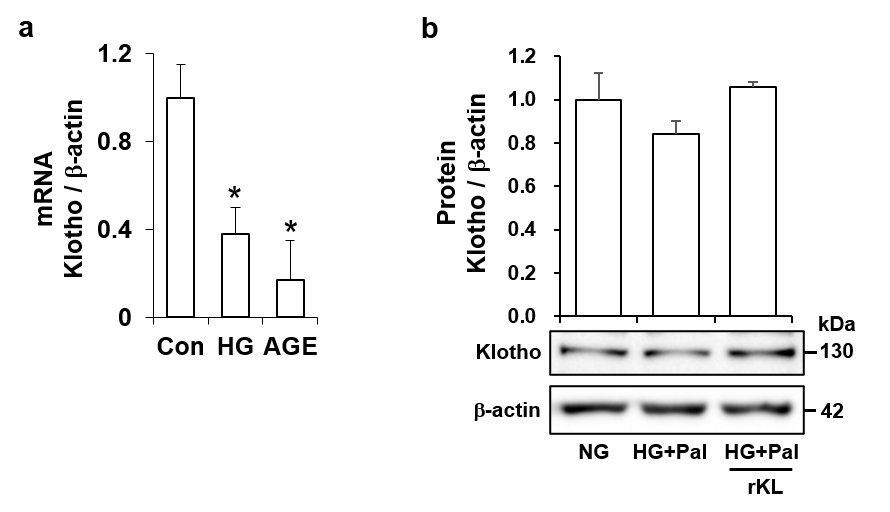
S1 Fig. Decreased klotho expression in HG- and AGE-treated mouse podocytes.** To investigate whether HG and advanced glycation end-products (AGE) could decrease expression level of klotho, mouse podocytes were treated with 30 mM HG or 100 mg/ml AGE for 24 hours. (a) klotho gene was quantified by real-time qPCR analysis and data was normalized by β-actin mRNA levels in the same sample. (b) Western blot showing decreased klotho by cotreatment of HG and Palmitate. Data is presented as the mean ± SD. *P < 0.05 versus control (CTL).
